# Supplementary material for: Screening and Characterization of Drugs That Protect Corneal Endothelial Cells Against Unfolded Protein Response and Oxidative Stress
Source: PubMed Central journal article supplement — Invest Ophthalmol Vis Sci. 2017 Feb;58(2):892–900. doi: 10.1167/iovs.16-20147 (PMC5295784; doi:10.1167/iovs.16-20147), 2017-02
Supplement: iovs-58-01-35_s01.pdf [file iovs-58-01-35_s01.pdf]

554 Supplemental Table 1. Primer sets used for real time PCR analysis.

| Gene                                              | Symbol       | Reference Sequence | Assay number* |
|---------------------------------------------------|--------------|--------------------|---------------|
| DNA damage inducible transcript 3 ( <i>CHOP</i> ) | <i>DDIT3</i> | NM_001195053       | Hs00358796_g1 |
| Activating transcription factor 4                 | <i>ATF4</i>  | NM_001675          | Hs00909569_g1 |
| Glyceraldehyde-3-phosphate dehydrogenase          | <i>GAPDH</i> | NM_001256799       | Hs02758991_g1 |

555 \* Manufacturer: Applied Biosystems (Foster City, CA)

556

556 Supplemental Table 2. Drugs with dose dependent or combined survival effect against oxidative stress  
 557 and/or UPR.

| Drug                        | Drug concentration<br>(% increased survival*) | Conditioning                  | Drug category                                    |
|-----------------------------|-----------------------------------------------|-------------------------------|--------------------------------------------------|
| Atazanavir                  | 100µM (49.27 %)                               | H <sub>2</sub> O <sub>2</sub> | Protease inhibitor                               |
|                             | 20µM (25.03 %)                                | H <sub>2</sub> O <sub>2</sub> |                                                  |
| Cimaterol                   | 100µM (33.28 %)                               | H <sub>2</sub> O <sub>2</sub> | Beta-adrenergic agonist                          |
|                             | 20µM (87.32 %)                                | H <sub>2</sub> O <sub>2</sub> |                                                  |
| L-(+)- Epinephrine tartrate | 100µM (43.94 %)                               | H <sub>2</sub> O <sub>2</sub> | Catecholamine                                    |
|                             | 20µM (34.74 %)                                | H <sub>2</sub> O <sub>2</sub> |                                                  |
| Ergothioneine               | 20µM (60.49 %)                                | H <sub>2</sub> O <sub>2</sub> | Thiourea derivative of histidine                 |
|                             | 100µM (27.50 %)                               | Thapsigargin                  |                                                  |
| Finasteride                 | 100µM (35.63 %)                               | H <sub>2</sub> O <sub>2</sub> | 5-alpha-reductase inhibitor                      |
|                             | 20µM (48.60 %)                                | H <sub>2</sub> O <sub>2</sub> |                                                  |
| Ketoprofen                  | 100µM (41.73 %)                               | H <sub>2</sub> O <sub>2</sub> | Propionic acid derivatives (NSAID <sup>^</sup> ) |
|                             | 20µM (29.73 %)                                | H <sub>2</sub> O <sub>2</sub> |                                                  |
| Mefenamic acid              | 100µM (98.35 %)                               | H <sub>2</sub> O <sub>2</sub> | Fenamic acid derivatives (NSAID)                 |
|                             | 100µM (27.52 %)                               | Thapsigargin                  |                                                  |
| Nimesulide                  | 20µM (84.02 %)                                | H <sub>2</sub> O <sub>2</sub> | Selective COX-2 inhibitor (NSAID)                |
|                             | 20µM (25.49 %)                                | Thapsigargin                  |                                                  |
| Moxifloxacin                | 100µM (47.20 %)                               | H <sub>2</sub> O <sub>2</sub> | Fluoroquinolone                                  |
|                             | 20µM (66.16 %)                                | H <sub>2</sub> O <sub>2</sub> |                                                  |
| Nedaplatin                  | 100µM (83.09 %)                               | H <sub>2</sub> O <sub>2</sub> | Platinum compound                                |
|                             | 20µM (33.00 %)                                | H <sub>2</sub> O <sub>2</sub> |                                                  |
| Nicergoline                 | 20µM (43.21 %)                                | H <sub>2</sub> O <sub>2</sub> | Ergot derivative                                 |
|                             | 20µM (30.42 %)                                | Thapsigargin                  |                                                  |
| Oxotremorine                | 100µM (35.44 %)                               | H <sub>2</sub> O <sub>2</sub> | Muscarinic receptor agonist                      |
|                             | 20µM (27.07 %)                                | Thapsigargin                  |                                                  |
| Procainamide                | 100µM (92.45 %)                               | Thapsigargin                  | Sodium channel blocker                           |
|                             | 20µM (31.81 %)                                | Thapsigargin                  |                                                  |
| Retinoic acid               | 100µM (92.16 %)                               | H <sub>2</sub> O <sub>2</sub> | Vitamin A                                        |
|                             | 20µM (66.48 %)                                | H <sub>2</sub> O <sub>2</sub> |                                                  |

|                            |                 |                               |                                        |
|----------------------------|-----------------|-------------------------------|----------------------------------------|
| Stanozolol                 | 100µM (80.48 %) | H <sub>2</sub> O <sub>2</sub> | Dihydrotestosterone derivative         |
|                            | 20µM (26.00 %)  | H <sub>2</sub> O <sub>2</sub> |                                        |
| (s)-(-)-Sulpride           | 100µM (47.26 %) | H <sub>2</sub> O <sub>2</sub> | Benzamide                              |
|                            | 20µM (31.58 %)  | H <sub>2</sub> O <sub>2</sub> |                                        |
| Terazosin                  | 100µM (63.75 %) | H <sub>2</sub> O <sub>2</sub> | Alpha 1 adrenergic antagonist          |
|                            | 20µM (25.85 %)  | H <sub>2</sub> O <sub>2</sub> |                                        |
| (+) -Tubocurarine chloride | 100µM (37.86 %) | H <sub>2</sub> O <sub>2</sub> | Non-depolarizing neuromuscular blocker |
|                            | 20µM (28.19 %)  | H <sub>2</sub> O <sub>2</sub> |                                        |
| Vidarabine                 | 100µM (61.78 %) | H <sub>2</sub> O <sub>2</sub> | Adenine arabinoside                    |
|                            | 20µM (83.37 %)  | H <sub>2</sub> O <sub>2</sub> |                                        |

558

559 \*increased luminescence (cell survival) compared to no drug treated controls exposed to H<sub>2</sub>O<sub>2</sub> or  
 560 thapsigargin.

561 ^Non-steroidal anti-inflammatory drug

562

562

563 **Supplemental Figure Legend:**

564 Supplemental Figure. Cytotoxic effects of H<sub>2</sub>O<sub>2</sub> (A) and thapsigargin (B) in cultured bovine corneal  
565 endothelial cells. Lethal dose 50 for H<sub>2</sub>O<sub>2</sub> and thapsigargin were 0.6 mM and 25.6 μM, respectively.

566 Results are expressed as mean ± SD.

567

567  
568

Supplemental Figure.

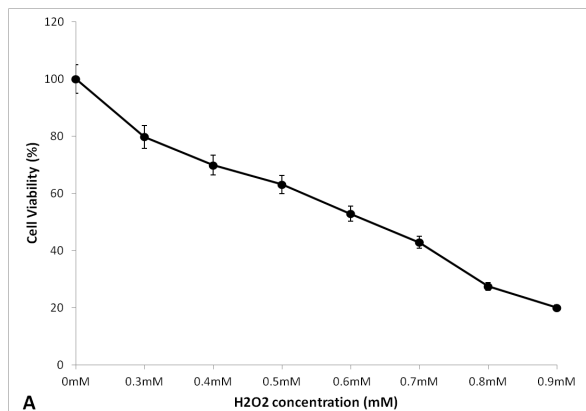

569

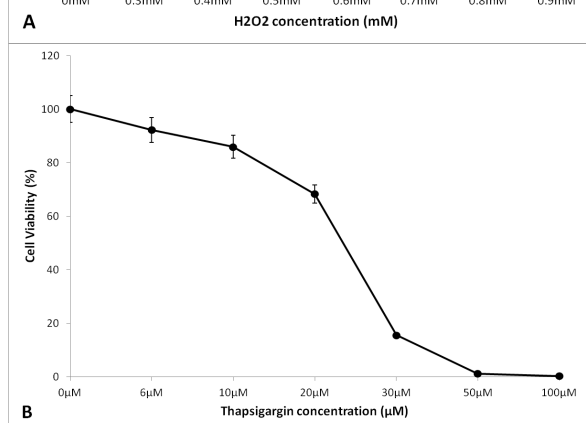

570
